# Supplementary material for: Ferromagnetic ordering in a new nickel polyborate NiB12O14(OH)10
Source: Royal Society of Chemistry journal article supplement (doi:10.1039/b517155e), 2006-01-01
Supplement: b517155e.pdf [file b517155e.pdf]

**Table S1 Fractional Atomic Coordinates, Isotropic Thermal Parameters ( $\text{\AA}^2$ ) for**

**$\text{NiB}_{12}\text{O}_{14}(\text{OH})_{10}$**

| Atom | x         | y          | z         | U(iso)      |
|------|-----------|------------|-----------|-------------|
| Ni1  | 0.5000    | 0.0000     | 0.5000    | 0.00732(18) |
| B1   | 0.5859(3) | 0.0161(5)  | 0.2069(4) | 0.0071(8)   |
| B2   | 0.3537(4) | 0.2945(5)  | 0.4391(5) | 0.0072(8)   |
| B3   | 0.2191(4) | 0.0367(4)  | 0.3569(5) | 0.0099(9)   |
| B4   | 0.8524(4) | 0.4018(5)  | 0.4003(5) | 0.0161(10)  |
| B5   | 0.4794(3) | 0.2504(5)  | 0.2463(5) | 0.0083(9)   |
| B6   | 0.9718(4) | 0.0997(5)  | 0.7080(5) | 0.0148(9)   |
| O1   | 0.3179(2) | -0.0374(3) | 0.4690(3) | 0.0123(6)   |
| O2   | 0.2248(2) | 0.0029(3)  | 0.1928(3) | 0.0121(5)   |
| O3   | 0.5829(2) | 0.1735(3)  | 0.2212(3) | 0.0084(5)   |
| O4   | 0.8946(2) | 0.0034(3)  | 0.6097(3) | 0.0108(5)   |
| O5   | 0.4499(2) | 0.2118(3)  | 0.3970(3) | 0.0066(5)   |
| O6   | 0.2363(2) | 0.2109(3)  | 0.3802(3) | 0.0089(5)   |
| O7   | 0.6612(2) | -0.0476(3) | 0.1221(3) | 0.0093(5)   |
| O8   | 0.3706(2) | 0.1995(3)  | 0.1148(3) | 0.0093(6)   |
| O9   | 0.5119(2) | -0.0793(3) | 0.2735(3) | 0.0074(5)   |
| O10  | 1.0773(3) | 0.1421(4)  | 0.6734(3) | 0.0199(7)   |
| O11  | 0.9506(3) | 0.1518(3)  | 0.8499(3) | 0.0229(7)   |
| O12  | 0.8348(4) | 0.3518(5)  | 0.5416(4) | 0.0329(10)  |
| H1   | 0.184(4)  | 0.264(6)   | 0.316(6)  | 0.034(15)   |
| H2   | 1.083(5)  | 0.107(6)   | 0.597(6)  | 0.035(16)   |
| H3   | 0.805(5)  | 0.389(7)   | 0.568(7)  | 0.03(2)     |
| H4   | 0.323(5)  | 0.141(6)   | 0.132(6)  | 0.034(16)   |
| H5   | 0.289(5)  | -0.126(7)  | 0.480(6)  | 0.053(18)   |

**Table S2** Anisotropic displacement parameters ( $\text{\AA}^2$ ) for  $\text{NiB}_{12}\text{O}_{14}(\text{OH})_{10}$

|     | U11        | U22        | U33        | U23         | U13         | U12         |
|-----|------------|------------|------------|-------------|-------------|-------------|
| Ni1 | 0.0082(3)  | 0.0070(3)  | 0.0072(3)  | 0.0004(3)   | 0.0025(2)   | 0.0011(3)   |
| B1  | 0.0066(17) | 0.010(2)   | 0.0043(16) | 0.0001(17)  | 0.0006(14)  | -0.0004(17) |
| B2  | 0.009(2)   | 0.0057(18) | 0.0069(18) | -0.0007(15) | 0.0027(15)  | 0.0006(15)  |
| B3  | 0.011(2)   | 0.009(2)   | 0.0096(19) | 0.0004(15)  | 0.0022(16)  | -0.0020(15) |
| B4  | 0.017(2)   | 0.016(2)   | 0.015(2)   | 0.0032(18)  | 0.0042(19)  | 0.0065(18)  |
| B5  | 0.009(3)   | 0.0078(18) | 0.0079(18) | -0.0008(15) | 0.0017(18)  | -0.0012(17) |
| B6  | 0.011(2)   | 0.018(2)   | 0.014(2)   | -0.0005(18) | 0.0025(17)  | -0.0057(17) |
| O1  | 0.0099(14) | 0.0112(15) | 0.0151(14) | 0.0023(10)  | 0.0009(11)  | -0.0017(10) |
| O2  | 0.0119(12) | 0.0148(12) | 0.0108(12) | -0.0012(12) | 0.0052(10)  | -0.0033(12) |
| O3  | 0.0075(13) | 0.0068(12) | 0.0121(13) | 0.0005(10)  | 0.0045(10)  | 0.0007(10)  |
| O4  | 0.0085(12) | 0.0145(12) | 0.0104(11) | -0.0019(12) | 0.0040(9)   | -0.0034(12) |
| O5  | 0.0081(13) | 0.0079(12) | 0.0041(11) | 0.0001(10)  | 0.0024(10)  | 0.0006(10)  |
| O6  | 0.0070(13) | 0.0096(12) | 0.0089(13) | 0.0015(11)  | -0.0010(10) | -0.0002(10) |
| O7  | 0.0103(13) | 0.0074(12) | 0.0118(12) | -0.0019(10) | 0.0059(10)  | -0.0013(9)  |
| O8  | 0.0092(13) | 0.0126(13) | 0.0069(13) | 0.0011(10)  | 0.0032(10)  | -0.0040(11) |
| O9  | 0.0079(13) | 0.0052(12) | 0.0096(12) | -0.0012(10) | 0.0033(10)  | 0.0000(10)  |
| O10 | 0.0154(16) | 0.0316(17) | 0.0142(15) | -0.0083(14) | 0.0063(12)  | -0.0126(13) |
| O11 | 0.0253(17) | 0.0297(17) | 0.0160(14) | -0.0095(13) | 0.0097(13)  | -0.0191(13) |
| O12 | 0.046(2)   | 0.035(2)   | 0.0246(19) | 0.0160(16)  | 0.0233(18)  | 0.0290(19)  |

**Table S3 Selected Bond Lengths (Å) and Angles (°) for NiB<sub>12</sub>O<sub>14</sub>(OH)<sub>10</sub>**

---

|        |          |            |          |
|--------|----------|------------|----------|
| Ni1-O5 | 2.044(2) | O3-B1-O7   | 118.6(3) |
| Ni1-O1 | 2.076(3) | O3-B1-O9   | 121.0(3) |
| Ni1-O9 | 2.104(2) | O7-B1-O9   | 120.4(3) |
| B1-O3  | 1.353(5) | O5-B2-O7   | 113.9(3) |
| B1-O7  | 1.366(5) | O5-B2-O8   | 110.1(3) |
| B1-O9  | 1.392(5) | O7-B2-O8   | 108.6(3) |
| B2-O5  | 1.426(5) | O5-B2-O6   | 111.4(3) |
| B2-O7  | 1.447(5) | O7-B2-O6   | 107.0(3) |
| B2-O8  | 1.488(5) | O8-B2-O6   | 105.4(3) |
| B2-O6  | 1.513(5) | O4-B3-O2   | 112.5(3) |
| B3-O4  | 1.441(5) | O4-B3-O1   | 111.7(3) |
| B3-O2  | 1.462(5) | O2-B3-O1   | 111.2(3) |
| B3-O1  | 1.464(5) | O4-B3-O6   | 107.8(3) |
| B3-O6  | 1.510(4) | O2-B3-O6   | 107.0(3) |
| B4-O12 | 1.350(6) | O1-B3-O6   | 106.2(3) |
| B4-O2  | 1.366(5) | O12-B4-O2  | 121.7(4) |
| B4-O11 | 1.375(5) | O12-B4-O11 | 118.5(4) |
| B5-O3  | 1.417(4) | O2-B4-O11  | 119.8(4) |
| B5-O5  | 1.454(5) | O3-B5-O5   | 113.6(3) |
| B5-O9  | 1.472(5) | O3-B5-O9   | 111.1(3) |
| B5-O8  | 1.556(5) | O5-B5-O9   | 111.4(3) |
| B6-O10 | 1.361(5) | O3-B5-O8   | 109.0(3) |
| B6-O4  | 1.362(5) | O5-B5-O8   | 106.4(3) |
| B6-O11 | 1.377(5) | O9-B5-O8   | 104.8(3) |
|        |          | O10-B6-O4  | 121.0(4) |
|        |          | O10-B6-O11 | 116.8(4) |
|        |          | O4-B6-O11  | 122.1(4) |

---

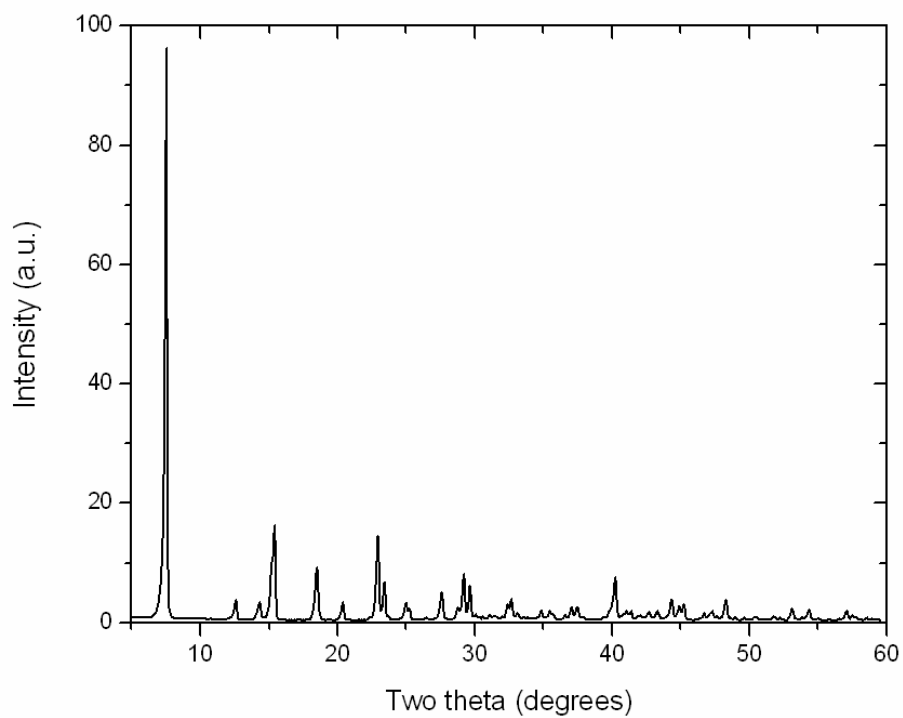

Figure S1. Powder X-ray diffraction pattern of  $\text{NiB}_{12}\text{O}_{14}(\text{OH})_{10}$ .

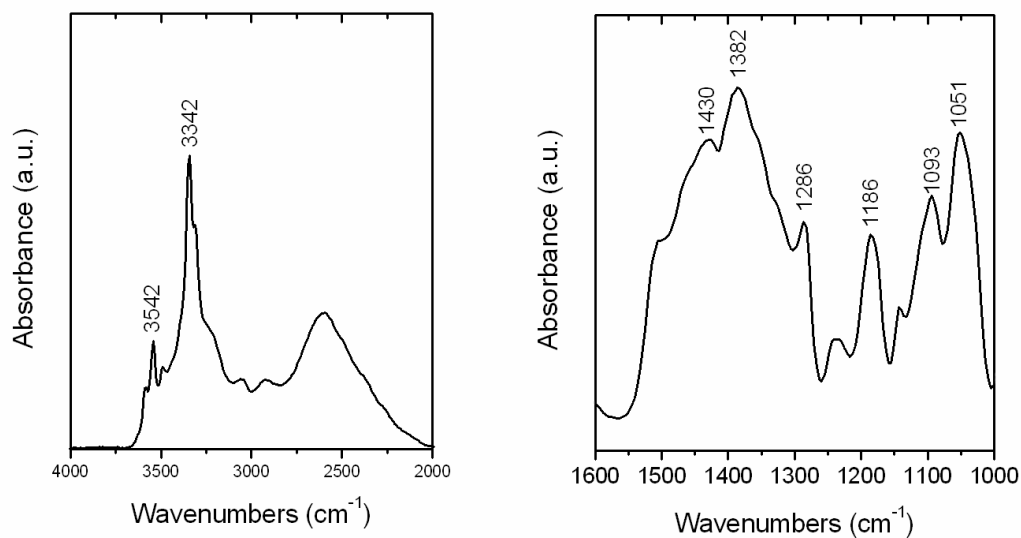

Figure S2. IR spectrum of NiB<sub>12</sub>O<sub>14</sub>(OH)<sub>10</sub>. The bands at 3342 and 3542 cm<sup>-1</sup> correspond to the hydroxyl groups in the structure; the bands at 1430 cm<sup>-1</sup>, 1382 cm<sup>-1</sup> and 1286 cm<sup>-1</sup> belong to the B-O antisymmetric stretch in [BO<sub>3</sub>]; the bands at 1186 cm<sup>-1</sup>, 1093 cm<sup>-1</sup> and 1051 cm<sup>-1</sup> belong to the B-O antisymmetric stretch of [BO<sub>4</sub>].

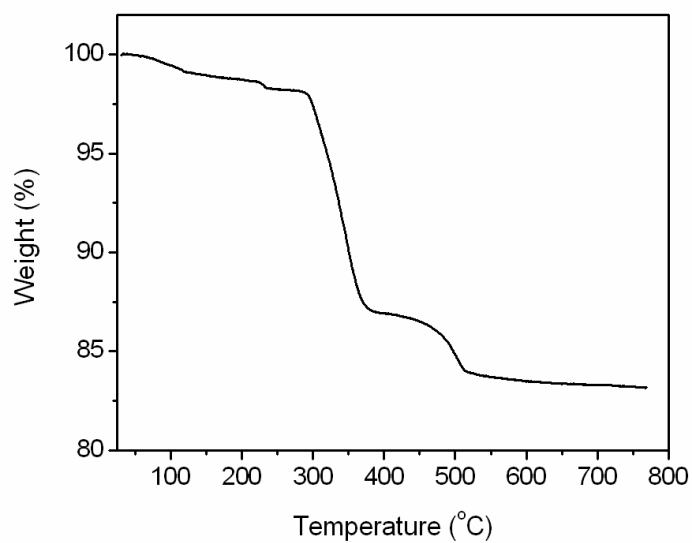

Figure S3. TGA measurement exhibits a total weight-loss of about 16.8 wt% below 800°C, which originates from the dehydration of the hydroxyl groups in  $\text{NiB}_{12}\text{O}_{14}(\text{OH})_{10}$ . The content of protons in the structure determined by the weight-loss value is consistent with the structural calculation result.
